# Supplementary material for: Population Pharmacokinetics of Inhaled Fluticasone Furoate and Vilanterol in Subjects with Chronic Obstructive Pulmonary Disease
Source: Springer Nature journal article supplement (doi:10.1007/s13318-015-0303-4), 2015-10-16

## Online Resource

### **Population pharmacokinetics of inhaled fluticasone furoate and vilanterol in subjects with chronic obstructive pulmonary disease**

Sarah Siederer<sup>1</sup>, Ann Allen<sup>1\*</sup>, Shuying Yang<sup>2</sup>

<sup>1</sup>Clinical Pharmacology Modelling and Simulation Department, GSK, Gunnels Wood Road, Stevenage, Herts, SG1 2NY, UK

<sup>2</sup>Clinical Pharmacology Modelling and Simulation Department, GSK, Stockley Park West, Uxbridge, Middlesex, UB11 1BT, UK

\*Deceased, December 2014

**Table S1** Summary of studies in population pharmacokinetic meta-analysis

| Study ID<br>(NCT no.;<br>protocol no.) | Design (Phase)                                                                                                      | Disease | No. subjects ITT<br>(M/F) | Formulation(s)<br>Device | Nominal doses<br>( $\mu\text{g}$ ) <sup>†</sup><br>Frequency                                                               | Duration treatment<br>(Day<br>pharmacokinetic<br>sampling) | Pharmacokinetic<br>sampling post-dose                                                                              |
|----------------------------------------|---------------------------------------------------------------------------------------------------------------------|---------|---------------------------|--------------------------|----------------------------------------------------------------------------------------------------------------------------|------------------------------------------------------------|--------------------------------------------------------------------------------------------------------------------|
| 1<br>(NCT01053988;<br>HZC112206)       | Multicenter,<br>randomized, double-<br>blind, placebo-<br>controlled, parallel-<br>group (Phase III)                | COPD    | 1,030<br>(345/685)        | FF/VI<br>VI<br>FF<br>DPI | FF/VI: 50/25,<br>100/25 $\mu\text{g}$<br>VI: 25 $\mu\text{g}$<br>FF: 100 $\mu\text{g}$<br>Placebo<br>Once daily (am)       | 24 weeks<br>(Days 84 & 168)                                | Pharmacokinetic:*<br>pre-dose & post-<br>dose 5–20 min,<br>0.5–1.5 h, & 2–4 h                                      |
| 2<br>(NCT01054885;<br>HZC112207)       | Multicenter,<br>randomized, double-<br>blind, placebo-<br>controlled, parallel-<br>group (Phase III)                | COPD    | 1,224<br>(339/885)        | FF/VI<br>VI<br>FF<br>DPI | FF/VI: 100/25,<br>200/25 $\mu\text{g}$<br>VI: 25 $\mu\text{g}$<br>FF: 100, 200 $\mu\text{g}$<br>Placebo<br>Once daily (am) | 24 weeks<br>(Days 84 & 168)                                | Pharmacokinetic:*<br>pre-dose & post-<br>dose 5–20 min,<br>0.5–1.5 h, & 2–4 h                                      |
| 3<br>(NCT01072149;<br>HZC110946)       | Multicenter,<br>randomized, double-<br>blind, placebo-<br>controlled, 3-way<br>incomplete cross-over<br>(Phase III) | COPD    | 54<br>(25/29)             | FF/VI<br>DPI             | 50/25, 100/25,<br>200/25 $\mu\text{g}$<br>Placebo<br>Once daily (am)                                                       | 4 weeks<br>(Day 28)                                        | Pharmacokinetic:**<br>pre-dose & post-<br>dose 5, 10, 15, 30,<br>60, & 90 min, 2, 3,<br>4, 6, 8, 12, 16, &<br>24 h |
| 4<br>(NCT00731822;<br>HZC111348***)    | Multicenter,<br>randomized,<br>double-blind, placebo-<br>controlled, parallel-<br>group<br>(Phase II)               | COPD    | 60<br>(40/20)             | FF/VI<br>DPI             | 400/25 $\mu\text{g}$ ( $n = 40$ )<br>Placebo ( $n = 20$ )<br>Once daily (am)                                               | 4 weeks<br>(Days 1, 14 & 2)                                | Pharmacokinetic:*<br>pre-dose & post-<br>dose 5, 10,<br>15, 20, 45, 60, &<br>90 min, 2, 3,<br>& 4 h                |

|                                                |                                                                   |     |               |              |                                                     |                   |                                                                                             |
|------------------------------------------------|-------------------------------------------------------------------|-----|---------------|--------------|-----------------------------------------------------|-------------------|---------------------------------------------------------------------------------------------|
| 5<br>(NCT01209026;<br>HZA102936 <sup>†</sup> ) | Randomized, placebo-<br>controlled, 4-way<br>cross-over (Phase I) | HVT | 85<br>(49/36) | FF/VI<br>DPI | 200/25; 800/100<br>µg<br>Placebo<br>Once daily (am) | 1 week<br>(Day 7) | Pharmacokinetic:*<br>pre-dose & post-<br>dose 5, 10,<br>& 30 min, 1, 2, 4,<br>8, 12, & 24 h |
|------------------------------------------------|-------------------------------------------------------------------|-----|---------------|--------------|-----------------------------------------------------|-------------------|---------------------------------------------------------------------------------------------|

ITT population, intent-to-treat population; COPD, chronic obstructive pulmonary disease; FF, fluticasone furoate; VI, vilanterol; DPI, dry powder inhaler; HVT, healthy volunteers

COPD: post-albuterol/salbutamol FEV<sub>1</sub>/FVC ratio of  $\leq 0.70$  at screening (Visit 1) (Pellegrino, 2005), measured post-albuterol/salbutamol FEV<sub>1</sub>  $\leq 70\%$  of predicted normal values calculated (via centralized vendor equipment) using NHANES III reference equations (Hankinson, 1999) at screening (Visit 1)

COPD Study 4: post-albuterol/salbutamol FEV<sub>1</sub>/FVC ratio of  $\leq 0.70$  at screening (Visit 1) (Pellegrino, 2005) measured post-albuterol/salbutamol FEV<sub>1</sub>  $\geq 40\%$  and  $\leq 80\%$  of predicted normal values calculated (via centralized vendor equipment) using NHANES III reference equations (Hankinson, 1999)

\*Lower limit of quantification of the FF & VI analytical assays = 10 pg/mL

\*\*Lower limit of quantification of the VI analytical assay = 20 pg/mL, FF analytical assay = 10 pg/mL

\*\*\*Steady-state (treatment days 14 and 28) included in analysis

<sup>†</sup>For 200/25 and 800/25 µg treatments single-dose placebo administered on Day 7. Placebo treatment administered with single-dose placebo and moxifloxacin (400 µg) on Day 7

<sup>‡</sup>Emitted doses 46/22, 92/22, 184/22 and 368/22 µg for FF/VI treatments, 22 µg for VI and 46, 92 and 184 µg for FF treatments

### Supplementary References

Hankinson JL, Odencrantz JR, Fedan KB (1999) Spirometric reference values from a sample of the general U.S. population. *Am J Respir Crit Care Med.* 159:179–187.

Pellegrino R, Viegi G, Brusasco V, Crapo RO, Burgos F, Casaburi R, Coates A, van der Grinten CP, Gustafsson P, Hankinson J, Jensen R, Johnson DC, MacIntyre N,

McKay R, Miller MR, Navajas D, Pedersen OF, Wanger J (2005) Interpretative strategies for lung function tests. *Eur Respir J.* 26:948–968

**Table S2** Demographic characteristics

| Demographic                                                  | FF dataset ( <i>n</i> = 1,307) | VI dataset ( <i>n</i> = 1,167) |
|--------------------------------------------------------------|--------------------------------|--------------------------------|
| Median age, years (range)                                    | 61.0 (18, 85)                  | 61.0 (18, 84)                  |
| Sex, n (%)                                                   |                                |                                |
| Male                                                         | 427 (33)                       | 327 (32)                       |
| Female                                                       | 880 (67)                       | 795 (68)                       |
| Mean BMI, kg/m <sup>2</sup> (range)                          | 26.3 (13.2, 63.0)              | 26.0 (13.2, 63.0)              |
| Mean height, cm (range)                                      | 169 (144, 200)                 | 170 (143, 200)                 |
| Mean weight, kg (range)                                      | 75.7 (35.0, 174.6)             | 75.3 (34.6, 160.0)             |
| Ethnicity, n (%)                                             |                                |                                |
| Hispanic or Latino                                           | 33 (3)                         | 31 (3)                         |
| Not Hispanic or Latino                                       | 1,274 (97)                     | 1,137 (97)                     |
| Race, n (%)                                                  |                                |                                |
| White – White/Caucasian/European heritage                    | 1,072 (82)                     | 957 (82)                       |
| African American/African heritage                            | 37 (3)                         | 36 (3)                         |
| Asian – East Asian heritage                                  | 65 (5)                         | 62 (5)                         |
| Asian – Central/South Asian heritage                         | 9 (<1)                         | 9 (<1)                         |
| Asian – Japanese heritage                                    | 48 (4)                         | 37 (3)                         |
| Asian – South East Asian heritage                            | 59 (5)                         | 52 (5)                         |
| American Indian/Native Alaskan                               | 5 (<1)                         | 4 (<1)                         |
| White – Arabic/North African                                 | 11 (<1)                        | 9 (<1)                         |
| Other                                                        | 2 (<1)                         | 1 (<1)                         |
| Smoker (COPD population), n (%)                              |                                |                                |
| No                                                           | 553 (45)                       | 513 (47)                       |
| Yes                                                          | 672 (55)                       | 578 (53)                       |
| Population, n (%)                                            |                                |                                |
| COPD                                                         | 1,225 (94)                     | 1,091 (94)                     |
| Healthy                                                      | 82 (6)                         | 76 (6)                         |
| Reversibility (COPD population), n (%)                       |                                |                                |
| No                                                           | 837 (69)                       | 728 (68)                       |
| Yes                                                          | 371 (31)                       | 348 (32)                       |
| % predicted FEV <sub>1</sub> (COPD population), mean (range) | 48.1 (14.4, 70.0)              | 48.8 (14.3, 76.2)              |

BMI, body mass index; COPD, chronic obstructive pulmonary disease; FEV<sub>1</sub>, forced expiratory volume in the first second

**Fig. S1** Fluticasone furoate (FF) and vilanterol (VI) concentrations relative to time of last dose following FF/VI (50/25, 100/25, 200/25 and 400/25  $\mu\text{g}$ ), FF (100 and 200  $\mu\text{g}$ ) or VI (25  $\mu\text{g}$ ) to subjects with COPD (Studies 1, 2, 3, and 4) and following FF/VI (200/25 and 800/25  $\mu\text{g}$ ) to healthy subjects (Study 5)

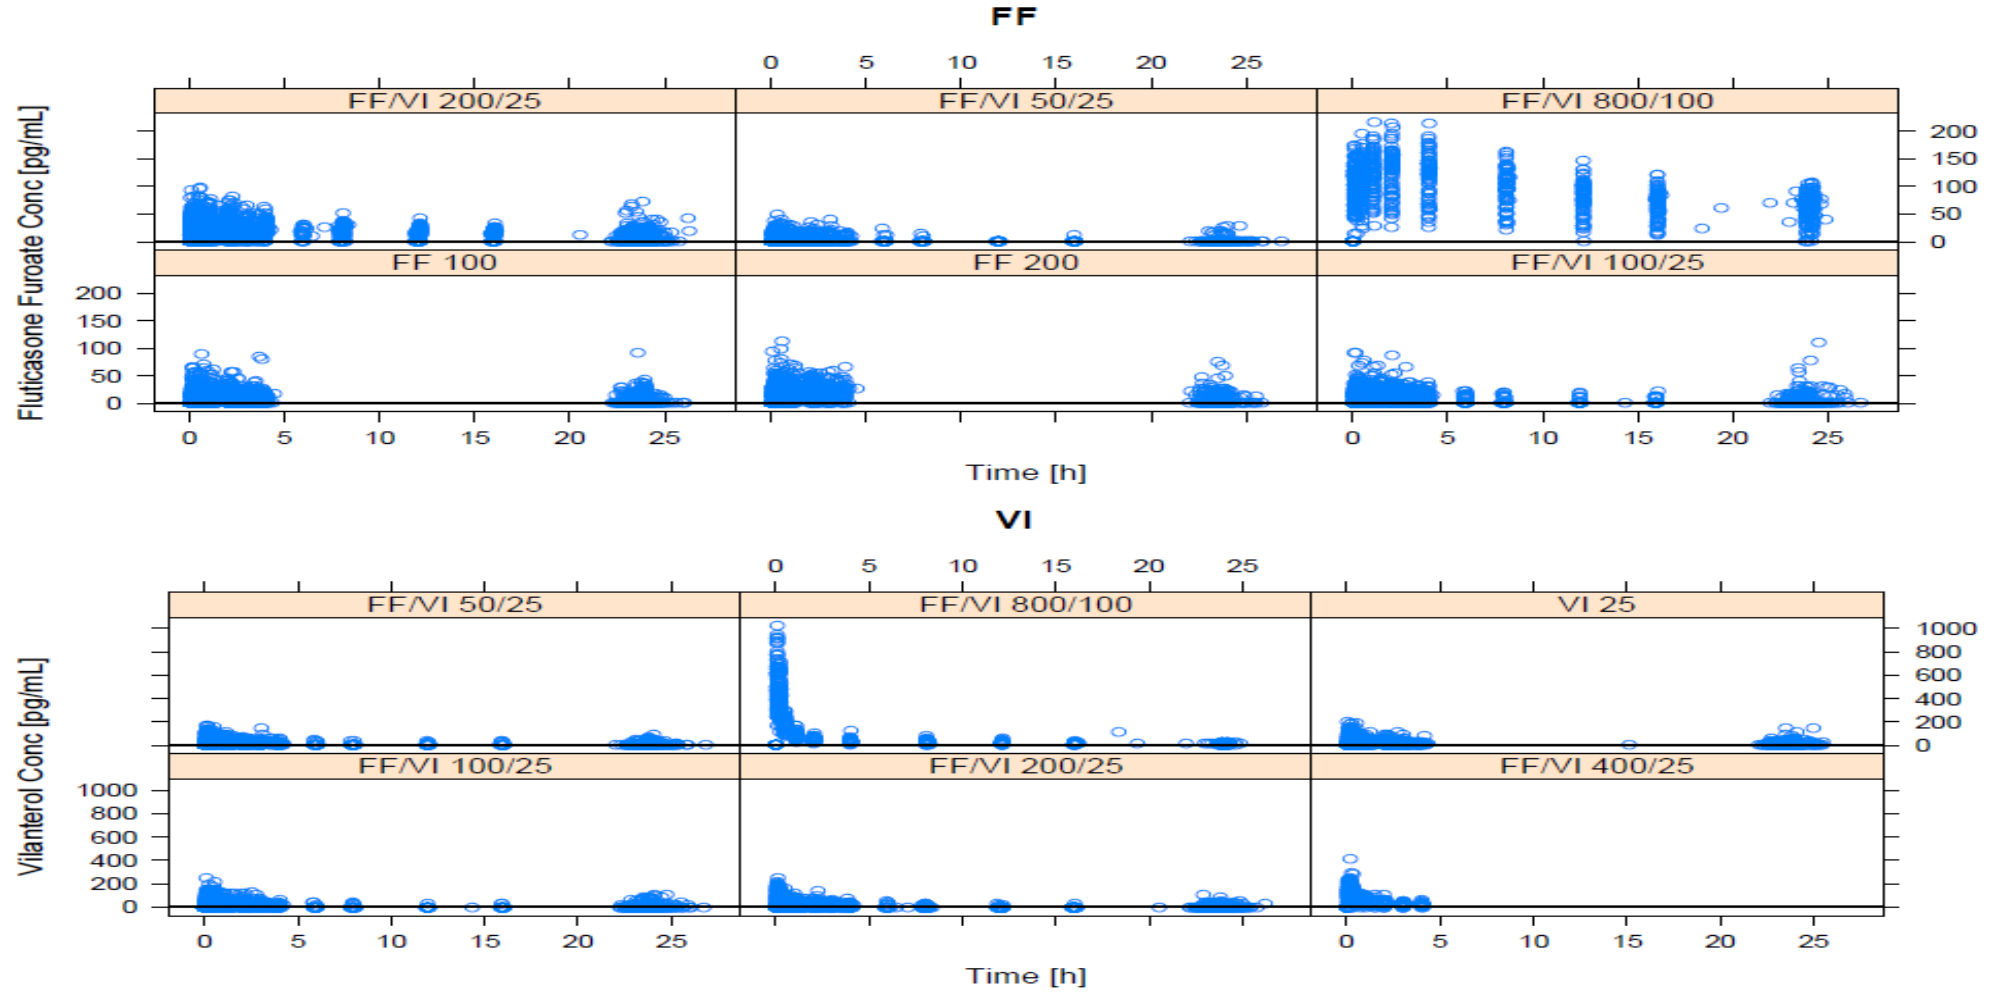

**Fig. S2** Plots for vilanterol  $C_{max}$  and  $AUC_{0-24}$  by age and weight following 25  $\mu$ g vilanterol (as FF/VI or vilanterol) to subjects with COPD

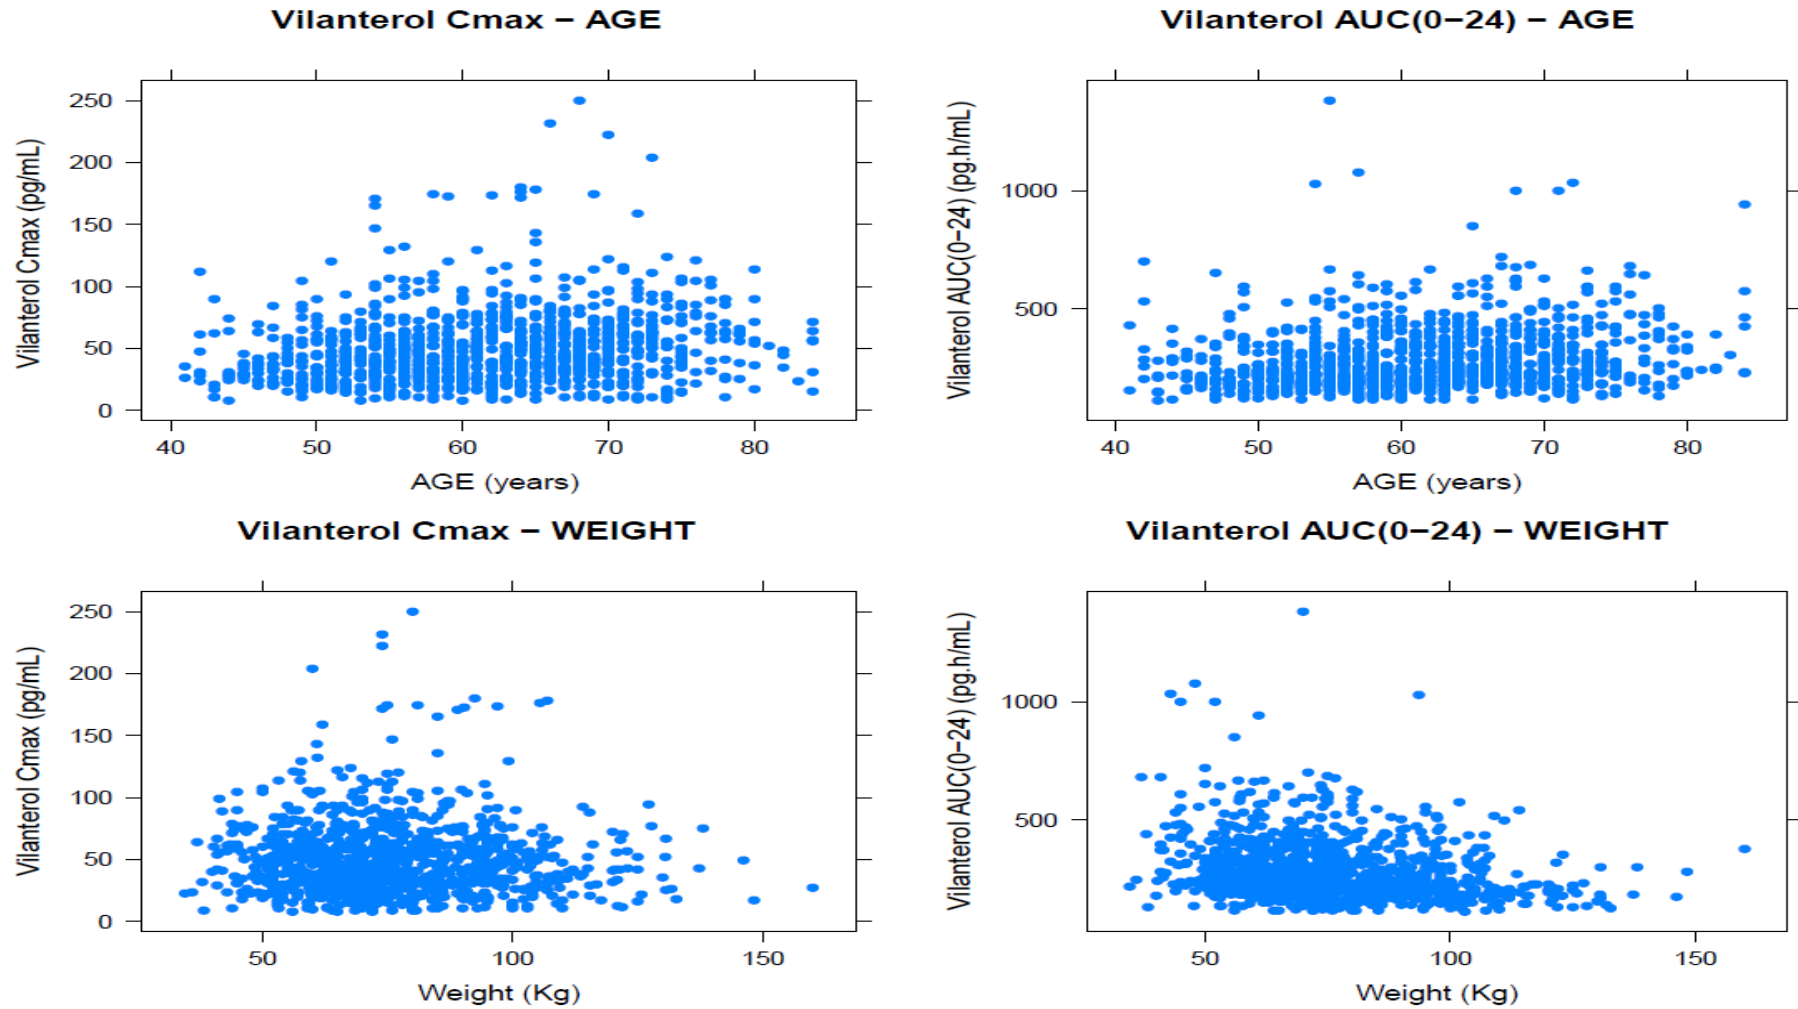

Supplement: MOESM1 [file 24106392]
